# Supplementary material for: Building carbon cloth-based dendrite-free potassium metal anodes for potassium metal pouch cells
Source: Royal Society of Chemistry journal article supplement (doi:10.1039/d1ta06327h), 2021-01-01
Supplement: d1ta06327h1.pdf [file d1ta06327h1.pdf]

## Supporting Information

### **Building Carbon Cloth-Based Dendrite-Free Potassium Metal Anodes for Potassium Metal Pouch Cells**

Fan Qiao, Jiashen Meng, Junjun Wang, Peijie Wu, Dawei Xu, Qinyou An, Xuanpeng Wang\*, Liqiang Mai\*

#### **Experimental section**

**Preparation of K-CC@SnO<sub>2</sub> composite anode.** SnCl<sub>2</sub> (0.30 g), poly(vinylpyrrolidone) (PVP, K30, 0.10 g) and 1,4-dicarboxybenzene (0.12 g) were successively dissolved in 70 mL of N,N-dimethylformamide (DMF) solvent under stirring at room temperature for 1 h to obtain a colorless transparent solution. The commercial carbon cloth was then fully immersed in the solution and transferred to a 100 mL Teflon-lined stainless-steel autoclave and heated to 180 °C for 12 h. After it cooled down to room temperature, the carbon cloth was collected, washed with methanol three times and dried at 60 °C vacuum drying oven. Subsequently, after complete pyrolysis at 450 °C for 3 h with heating rate of 5 °C min<sup>-1</sup> in Muffle, the CC@SnO<sub>2</sub> was obtained. The CC@SnO<sub>2</sub> slices were obtained by cutting CC@SnO<sub>2</sub> into disc with a diameter of 10 mm. Finally, facile molten infusion was performed under ~80 °C (Video S1) in an argon-filled glovebox (H<sub>2</sub>O, O<sub>2</sub> < 0.1 ppm) to embed K into the CC@SnO<sub>2</sub> slice framework. The K-CC@SnO<sub>2</sub> composite anode was obtained with an average load of 21.40-36.18 mg cm<sup>-2</sup>. In the pouch cell, the area of the cathode is 23 cm<sup>2</sup> (5.75 cm \*4 cm), the active material is 25 mg, the area of the anode is 27 cm<sup>2</sup> (6 cm \*4.5 cm) and the amount of electrolyte is 2.5 mL.

**Material characterization.** XRD patterns were received by a Bruker D8 Discover X-ray diffractometer with Cu K $\alpha$  radiation source. The SEM images were acquired by a JEOL-7100F microscope. XPS analysis was performed using a VG MultiLab 2000. Fourier transform

infrared (FTIR) transmittance spectra were recorded using a Nicolet 6700 (Thermo Fisher Scientific Co., USA) IR spectrometer.

**Electrochemical characterization.** In the symmetry cells and full cells electrochemical measurements, CR2016-type coin cells were assembled in an argon-filled glove box ( $\text{H}_2\text{O}$ ,  $\text{O}_2$  < 0.1 ppm), GF/D was used as separator, and 1 M solution of KFSI in ethylene carbonate (EC) and dimethyl carbonate (DEC) (1:1, volume ratio) as the electrolyte. The commercial PTCDI was bought from Alfa Aesar Co. The PTCDI electrodes with an ordinary mass loading ( $\sim 1.0 \text{ mg cm}^{-2}$ ) were obtained by casting process. 60 wt% active materials, 30 wt% acetylene black and 10 wt% polyvinylidene fluoride binder were mixed to produce a homogenous slurry. Then the slurry was casted on Al foil with carbon-coated and dried at  $70^\circ\text{C}$  overnight. The electrode slices were obtained by cutting the dried foil into disc with a diameter of 10 mm. Galvanostatic charge/discharge tests were conducted using a LAND CT2001A. Cyclic voltammetry (1.5-3.5 V) and electrochemical impedance spectra were tested using an electrochemical workstation (Autolab PGSTAT302N).

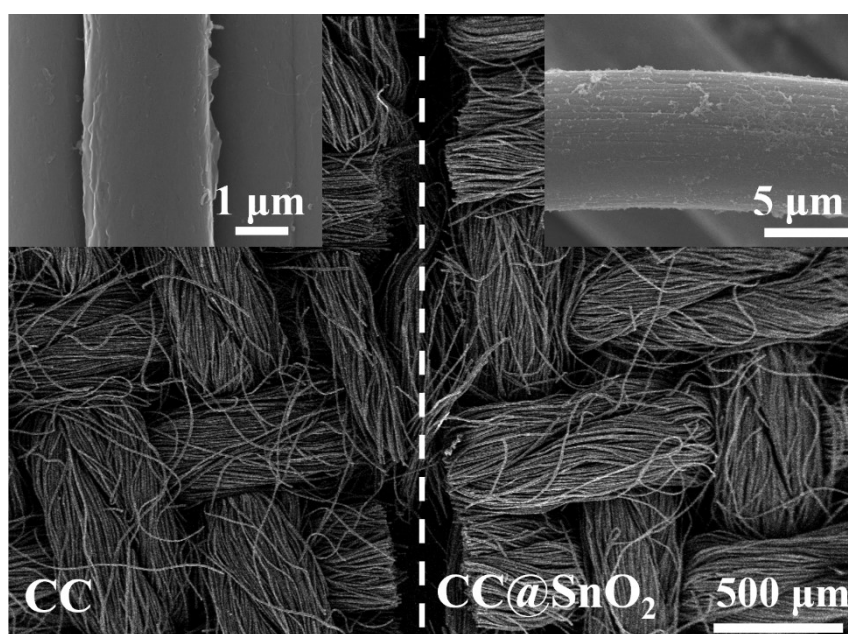

**Figure S1.** SEM images of CC and CC@SnO<sub>2</sub>.

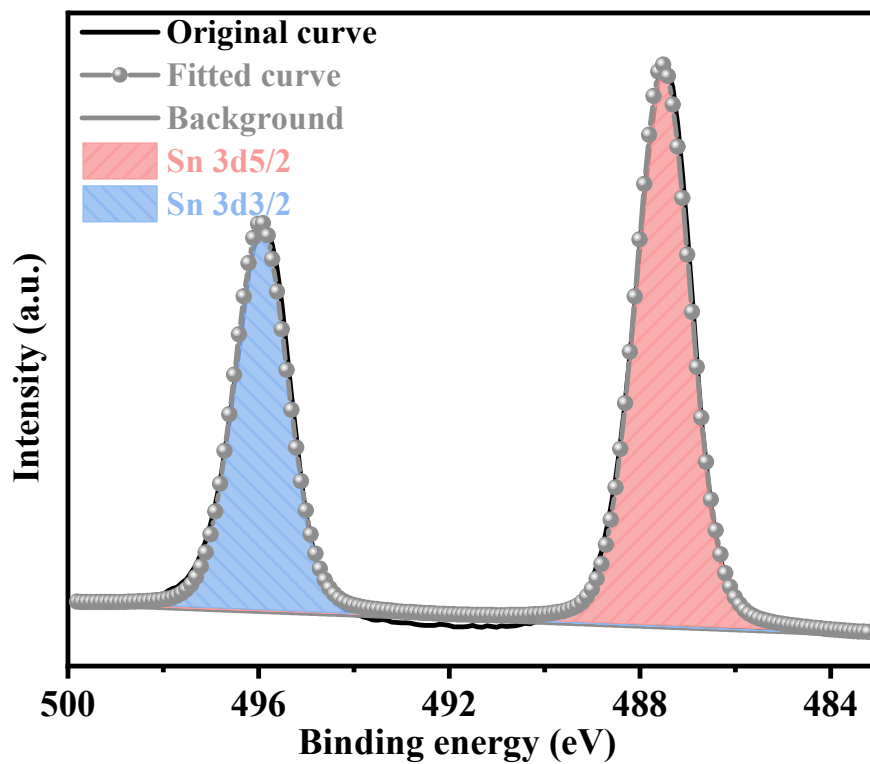

Figure S2. High resolution Sn 3d XPS spectra of CC@SnO<sub>2</sub>.

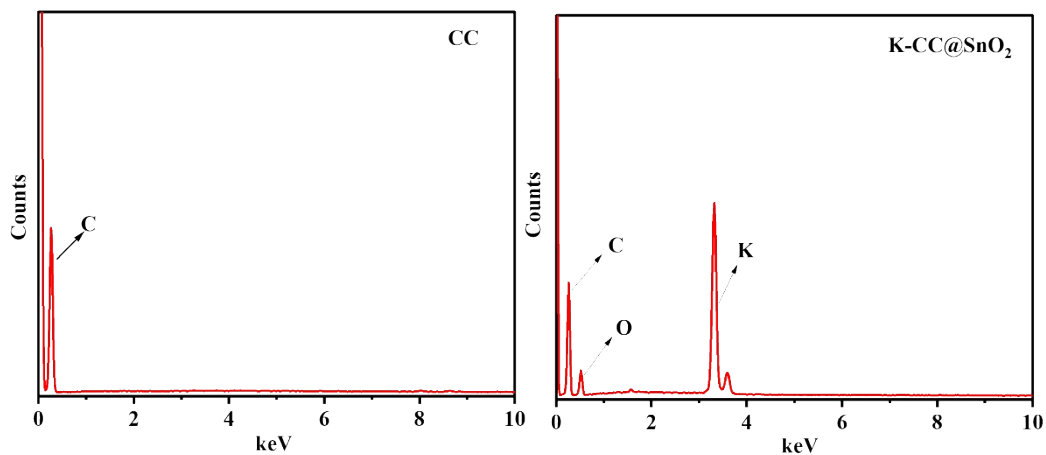

Figure S3. The EDS images of (a) CC and (b) K-CC@SnO<sub>2</sub>.

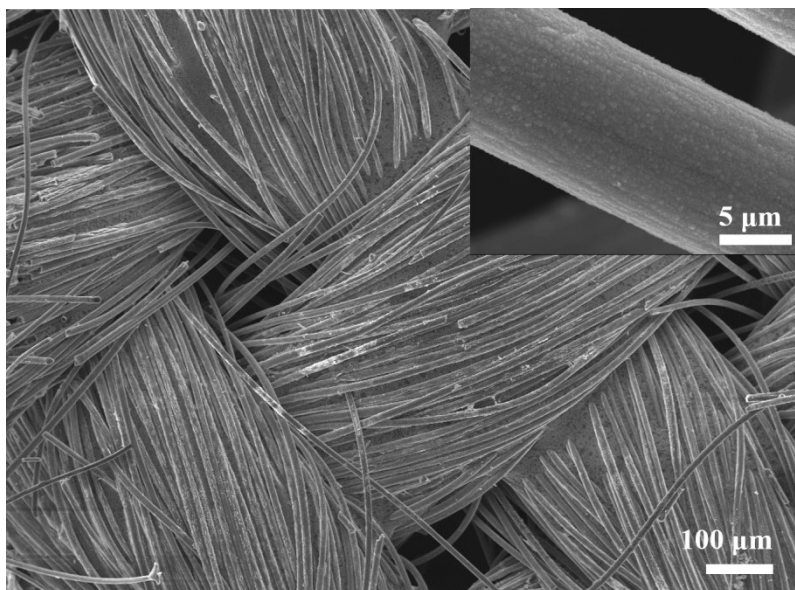

Figure S4. SEM images of K-CC@SnO<sub>2</sub>.

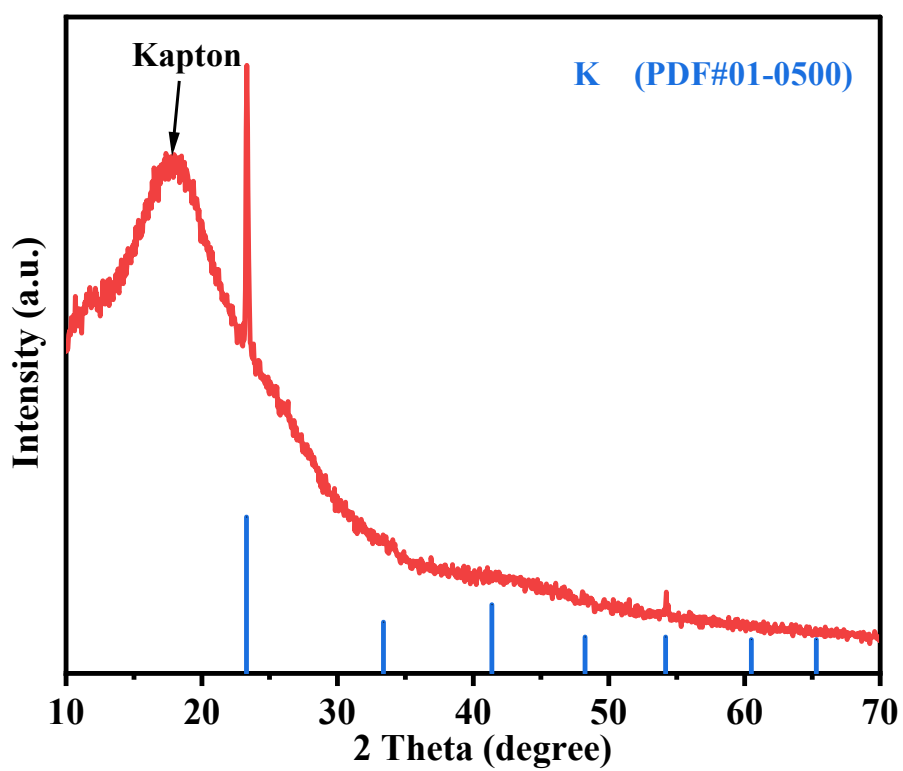

Figure S5. XRD pattern of K-CC@SnO<sub>2</sub>.

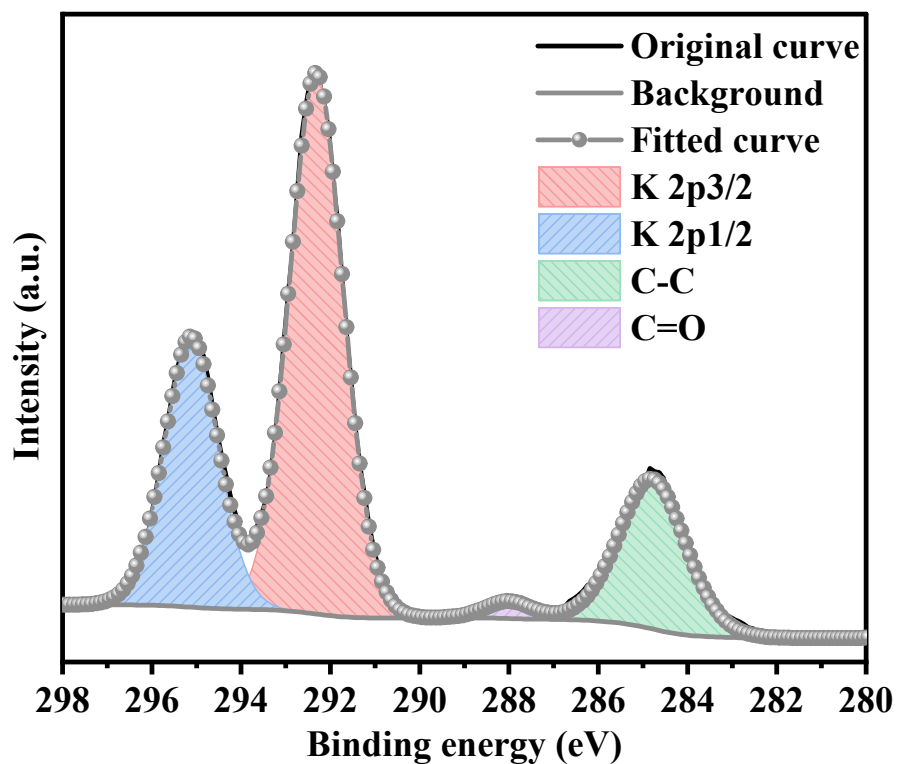

**Figure S6.** High resolution K 2p and C 1s XPS spectra of K-CC@SnO<sub>2</sub>.

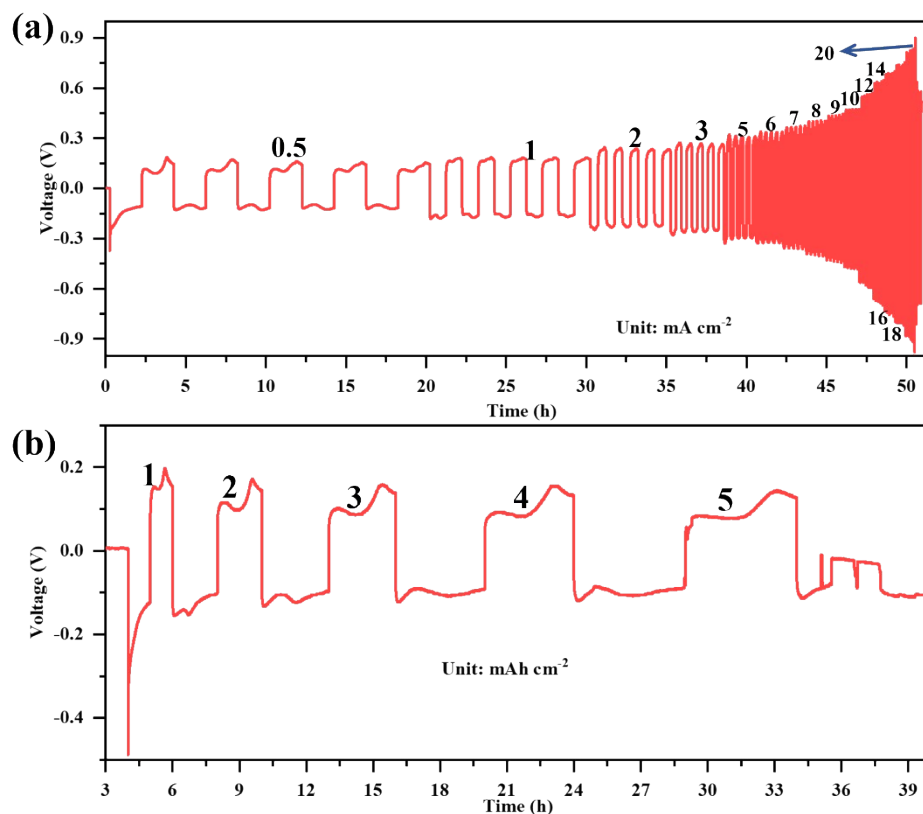

**Figure S7.** The voltage profile of K-CC@SnO<sub>2</sub> (a) with the capacity of 1 mAh cm<sup>-2</sup> at different current densities and (b) with different capacity at 1 mA cm<sup>-2</sup>.

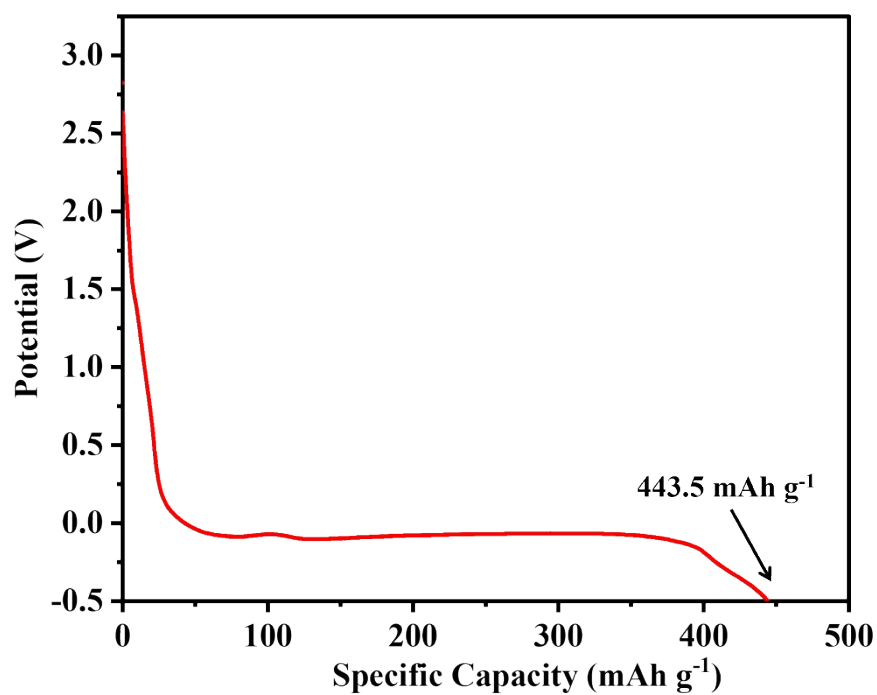

**Figure S8.** The Discharge curve of K-CC@SnO<sub>2</sub>||CC@SnO<sub>2</sub> cell at 1 mA cm<sup>-2</sup>.

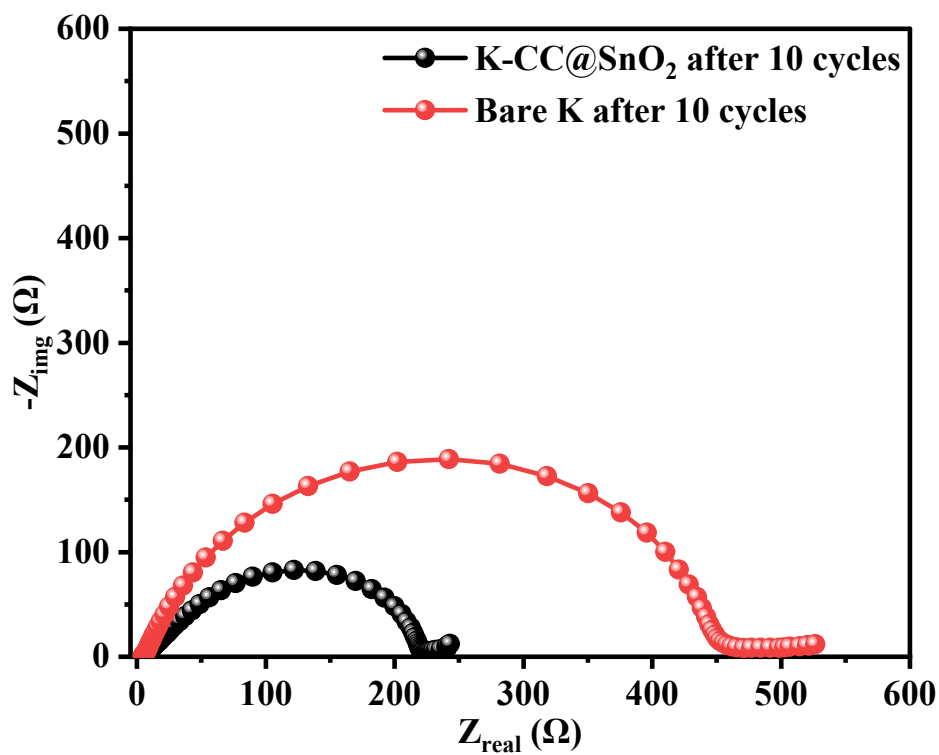

**Figure S9.** Impedance plots of K||K and K-CC@SnO<sub>2</sub>||K-CC@SnO<sub>2</sub> symmetric cells after 10 cycles.

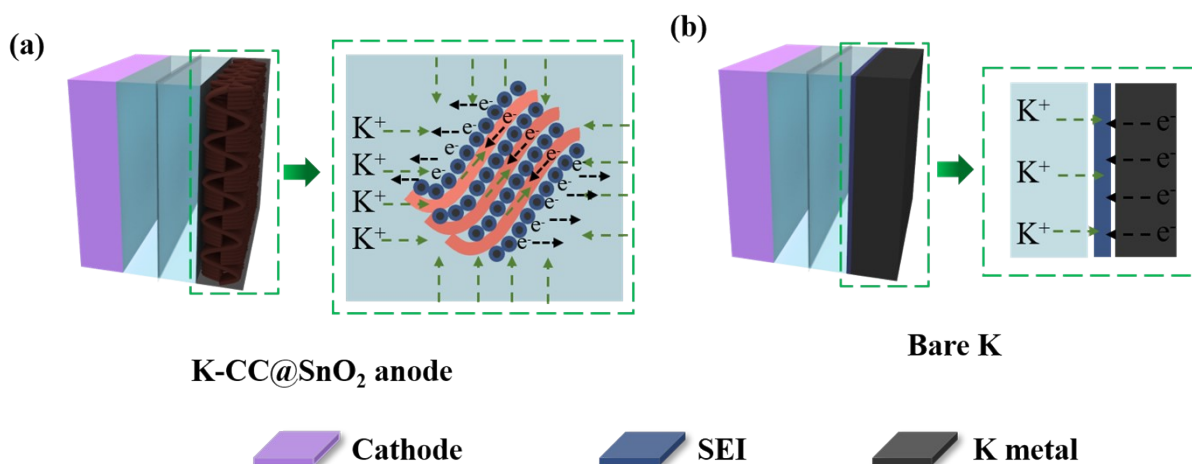

**Figure S10.** Schematics of ions and electronics network in a K-CC@SnO<sub>2</sub> electrode (a) and in a traditional chunk of K metal (b).

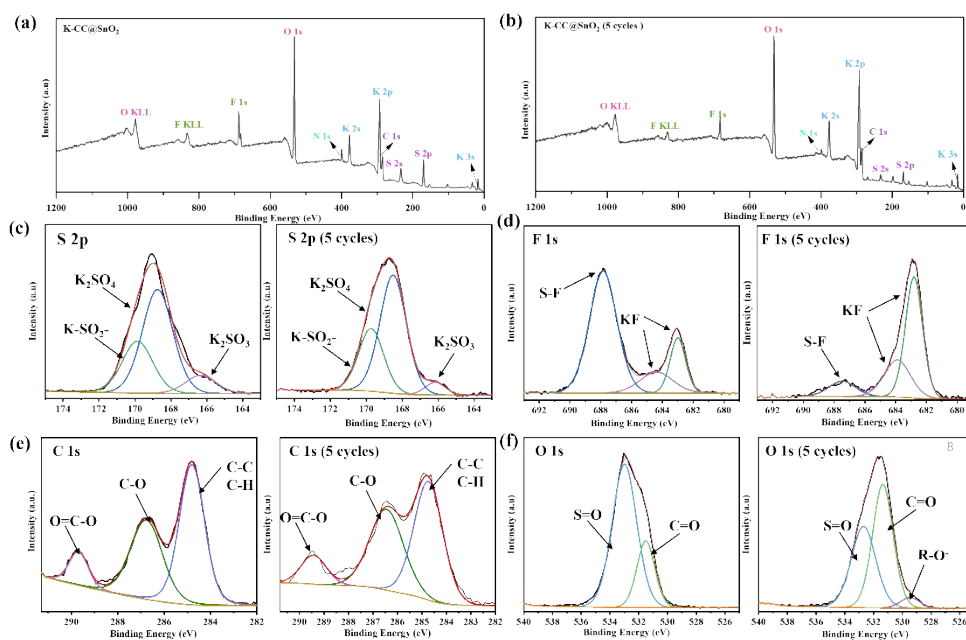

**Figure S11.** XPS survey spectrum of (a) the initial and (b) cycled K-CC@SnO<sub>2</sub> electrode. High-resolution (c) S 2p, (d) F 1s, (e) C 1s and (f) O 1s XPS spectra of the pristine and cycled K-CC@SnO<sub>2</sub> electrode.

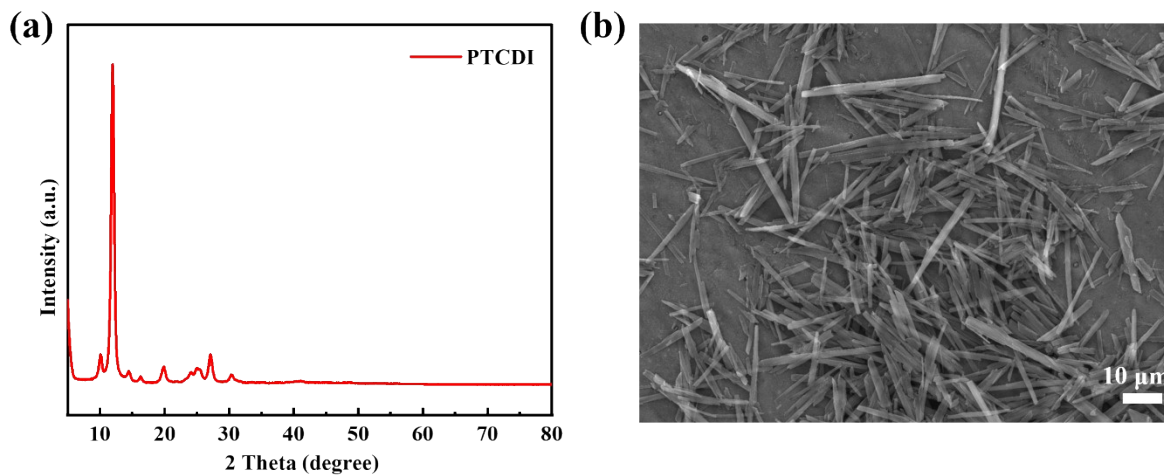

Figure S12. XRD pattern (a) and SEM image (b) of PTCDI.

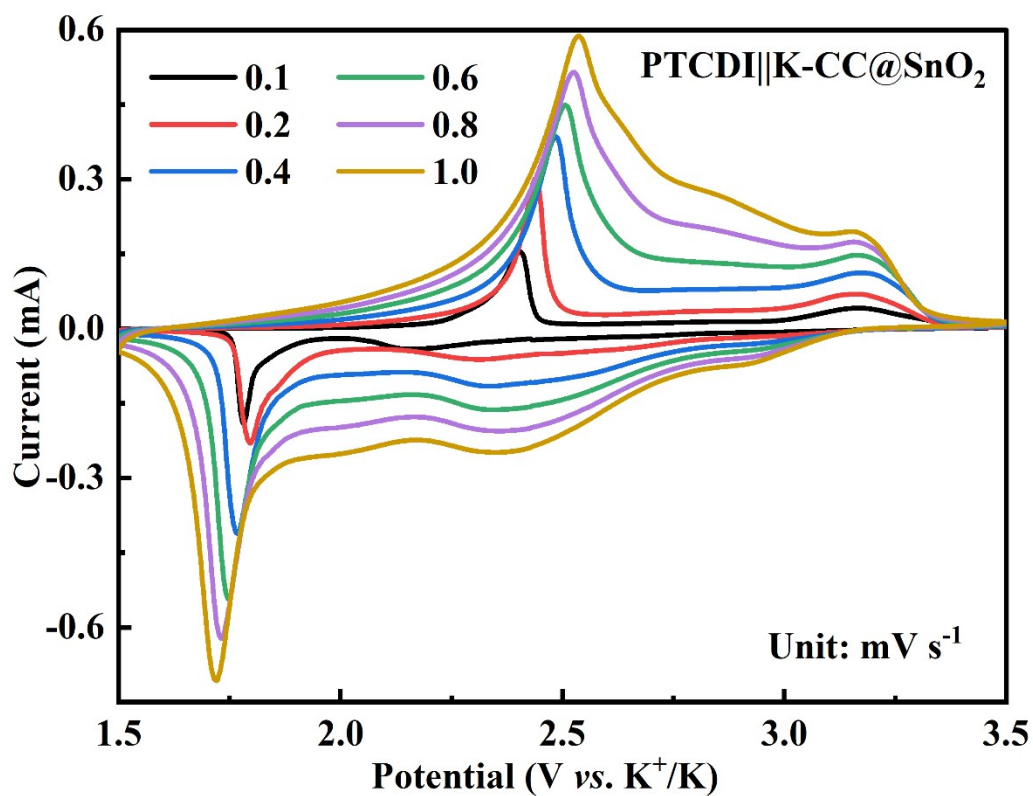

Figure S13. Typical CV curves of the PTCDI||K-CC@SnO<sub>2</sub> cell at various scan rates.



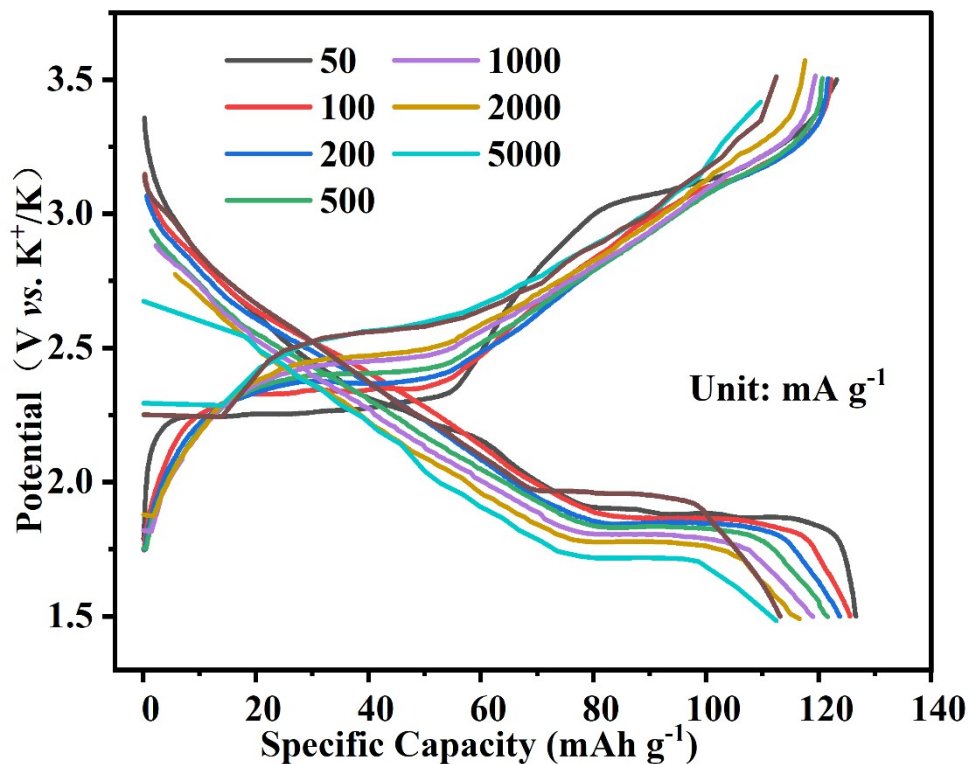

**Figure S14.** The charge-discharge curves of PTCDI||K-CC@SnO<sub>2</sub> full cell at various current densities.

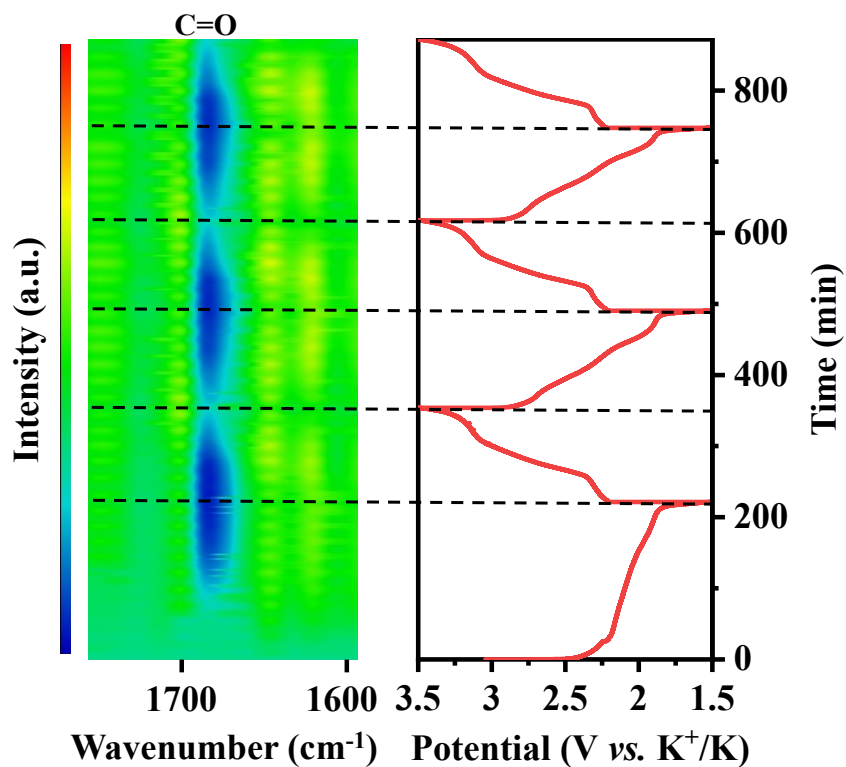

**Figure S15.** The in-situ FT-IR spectroscopy of PTCDI in the PTCDI||K-CC@SnO<sub>2</sub> full cell.

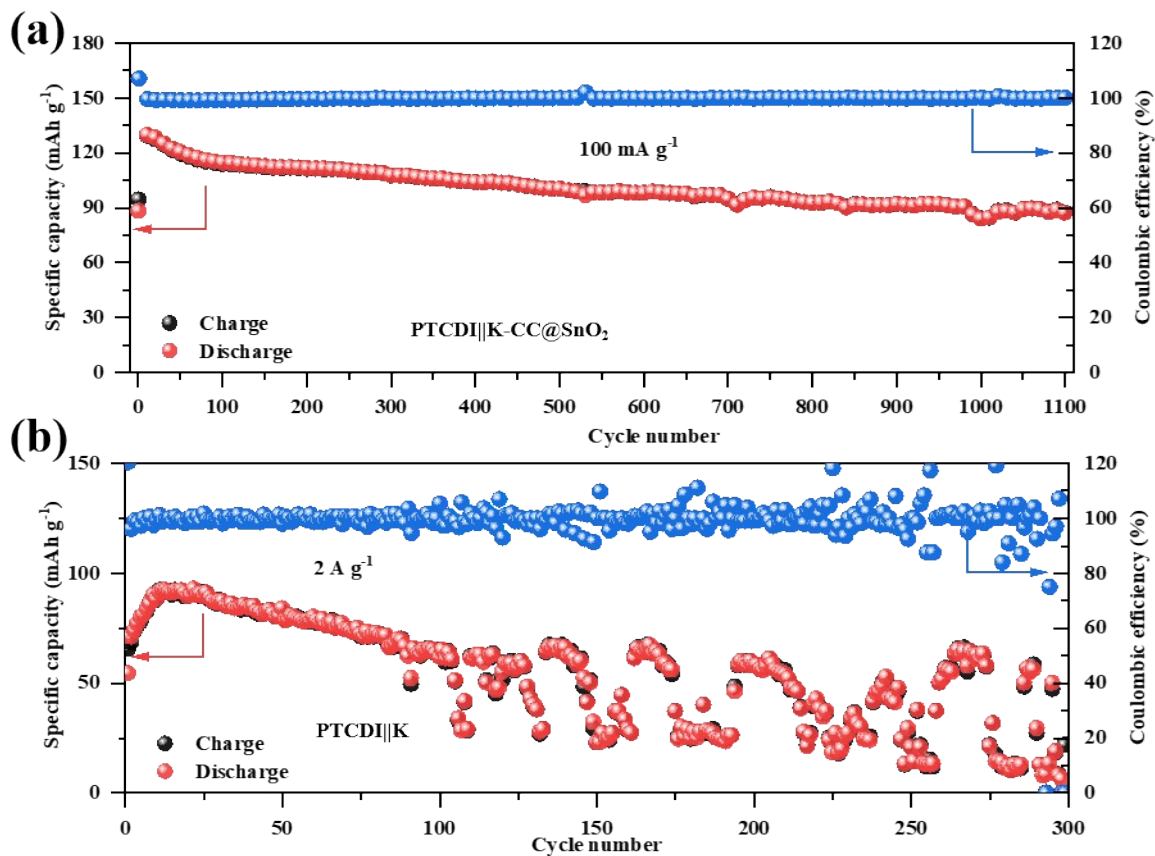

**Figure S16.** The cycling performance of PTCDI||K-CC@SnO<sub>2</sub> full cell at 100 mA g<sup>-1</sup> (a) and the cycling performance of PTCDI||K full cell at 2000 mA g<sup>-1</sup> (b).

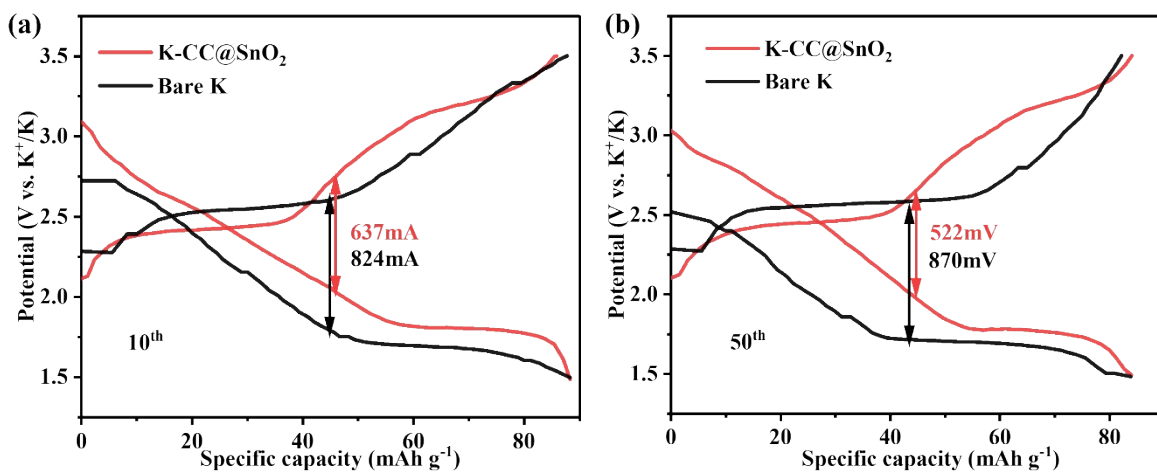

**Figure S17.** Typical galvanostatic voltage profiles in the 10<sup>th</sup> (a) and 50<sup>th</sup> (b) cycles at the current density of 2 A g<sup>-1</sup>.

**Table S1.** The summary of OPIBs electrode materials.

| Organic electrode materials                                    | Potential window (V) | Electrolyte                            | Capacity retention (cycle number, current density)    | Reference |
|----------------------------------------------------------------|----------------------|----------------------------------------|-------------------------------------------------------|-----------|
| PTCDI                                                          | 1.5-3.5              | 1 M KFSI-EC/DEC                        | 70.9% (10000, 2000 mA g <sup>-1</sup> )               | This work |
| PTCDI                                                          | 1.4-3.8              | 5 M KFSI-EC/DMC                        | 87.5% (600, 4000 mA g <sup>-1</sup> )                 | [1]       |
| PTCDI-DAQ                                                      | 1.0-3.8              | 1 M KPF <sub>6</sub> -DME/0.05M LiTFSI | 76.7% (900, 3 A g <sup>-1</sup> )                     | [2]       |
| AQDS                                                           | 1.4-3.0              | 0.8 M KPF <sub>6</sub> -EC/DEC         | 82.1% (100, 0.1 C)                                    | [3]       |
| o-Na <sub>2</sub> C <sub>6</sub> H <sub>2</sub> O <sub>6</sub> | 1.0-3.0              | 0.8 M KPF <sub>6</sub> -EC/DEC         | 38.7% (100, 25 mA g <sup>-1</sup> )                   | [4]       |
| p-Na <sub>2</sub> C <sub>6</sub> H <sub>2</sub> O <sub>6</sub> | 1.0-3.0              | 0.8 M KPF <sub>6</sub> -EC/DEC         | 47.3% (50, 0.1 C)                                     | [5]       |
| VK@CNT                                                         | 0.2-2.5              | 0.8 M KPF <sub>6</sub> -EC/DEC         | 65.6% (100, 100 mA g <sup>-1</sup> )                  | [6]       |
| PTCDA                                                          | 1.5-3.5              | 0.5 M KPF <sub>6</sub> -EC/DEC         | 77% (200, 10 mA g <sup>-1</sup> )                     | [7]       |
| K <sub>4</sub> PTC@CNTs                                        | 0.1-2.0              | 1 M KFSI-EC/DMC                        | 73.5% (500, 50 mA g <sup>-1</sup> )                   | [8]       |
| K <sub>2</sub> SBDC                                            | 0.1-2.5              | 1 M KFSI-EC/DMC                        | 124 mAhg@1 (100, 50 mA g <sup>-1</sup> )              | [9]       |
| K <sub>2</sub> BPDC@GR                                         | 0.1-2.5              | 1 M KFSI-EC/DMC                        | 170 mAh g <sup>-1</sup> (100, 50 mA g <sup>-1</sup> ) | [9]       |
| K <sub>2</sub> TP                                              | 0.1-2.0              | 1 M KPF <sub>6</sub> -DME              | 92.0% (100, 200 mA g <sup>-1</sup> )                  | [10]      |
| K <sub>2</sub> PC                                              | 0.1-2.0              | 1 M KFSI-EC/DMC                        | 93% (100, 0.2 C)                                      | [11]      |
| AIBN                                                           | 0.01-3.0             | -                                      | 40% (100, 10 mA g <sup>-1</sup> )                     | [12]      |
| ADAPTS                                                         | 0.5-3.0              | 0.8 M KPF <sub>6</sub> -EC/DEC         | 79% (400, 1 C)                                        | [13]      |
| OHTAP                                                          | 0.5-3.0              | 0.8 M KPF <sub>6</sub> -EC/DEC         | 81% (80, 2 C)                                         | [13]      |
| OHTAP                                                          | 1.1-3.1              | 1 M KTFSI-DOL/DME                      | 73.6% (50, 0.1 C)                                     | [14]      |
| PQ-1,5                                                         | 1.2-3.2              | 1 M KTFSI-DOL/DME                      | 91% (200, 250 mA g <sup>-1</sup> )                    | [15]      |
| PQ-1,4                                                         | 1.2-3.2              | 1 M KTFSI-DOL/DME                      | 50 mA g <sup>-1</sup>                                 | [15]      |
| PQ-CN                                                          | 1.2-3.2              | 1 M KTFSI-DOL/DME                      | 52.2% (200, 250 mA g <sup>-1</sup> )                  | [15]      |
| PI@G                                                           | 1.5-3.5              | KFSI-DME (1:5, molar ratio)            | 83% (500, 100 mA g <sup>-1</sup> )                    | [16]      |
| PAQS                                                           | 1.3-3.4              | 0.5 M KTFSI-DOL/DME                    | 77.2% (200, 200 mA g <sup>-1</sup> )                  | [17]      |
| PPTS                                                           | 0.8-3.2              | 1 M KPF <sub>6</sub> -DME              | 73.7% (3000, 5 A g <sup>-1</sup> )                    | [18]      |

|                                                                           |           |                                |                                                        |      |
|---------------------------------------------------------------------------|-----------|--------------------------------|--------------------------------------------------------|------|
| PTCDA-kC (k=0, 2, 3, 4)                                                   | 1.2–3.2   | 5 M KTFSI-DME                  | 75% (1000, 2.21 C, k=0),<br>94% (1000, 7.35 C, k=2)    | [19] |
| p-DPPZ                                                                    | 2.5–4.5   | 2.2 M KPF <sub>6</sub> -DG     | 59% (2000, 2 A g <sup>-1</sup> )                       | [20] |
| PDPPD                                                                     | 2.5–4.5   | 0.5 M KPF <sub>6</sub> -EC/DEC | 86% (500, 1 C)                                         | [21] |
| PHAT                                                                      | 0.9–3.4   | 1 M KPF <sub>6</sub> -DME      | 169 mAh g <sup>-1</sup> (4600, 10 A g <sup>-1</sup> )  | [22] |
| MIL-125(Ti)                                                               | 0.01–3.0  | 1 M KFSI-EC/DEC                | 90.2% (2000, 200 mA g <sup>-1</sup> )                  | [23] |
| L-Co <sub>2</sub> (OH) <sub>2</sub> BDC                                   | 0.2–3.0   | 1 M KPF <sub>6</sub> -DME      | 188 mAh g <sup>-1</sup> (600, 1 A g <sup>-1</sup> )    | [24] |
| K-MOF [C <sub>7</sub> H <sub>3</sub> KNO <sub>4</sub> ] <sub>n</sub> @CNT | 0.1–2.0   | 1 M KFSI-EC/DMC                | 92% (300, 100 mA g <sup>-1</sup> )                     | [25] |
| MOF-235/MCNTs                                                             | 0.01–3.0  | 1 M KFSI-EC/DEC                | 132 mAh g <sup>-1</sup> (200, 200 mA g <sup>-1</sup> ) | [26] |
| UCF@CNs@BiN                                                               | 0.01–3.0  | 3 M KFSI-DME                   | 77% (600, 100 mA g <sup>-1</sup> )                     | [27] |
| CTF-0                                                                     | 0.01–3.0  | 0.8 M KPF <sub>6</sub> -EC/DEC | 73.4% (200, 100 mA g <sup>-1</sup> )                   | [28] |
| CTF-1                                                                     | 0.01–3.0  | 0.8 M KPF <sub>6</sub> -EC/DEC | 60 mAh g <sup>-1</sup> (200, 100 mA g <sup>-1</sup> )  | [28] |
| COF-10@CNT                                                                | 0.005–3.0 | 1 M KFSI-EC/DEC                | 161 mAh g <sup>-1</sup> (4000, 1 A g <sup>-1</sup> )   | [29] |
| CMPs                                                                      | 0.1–3.0   | 0.8 M KPF <sub>6</sub> -EC/DEC | 272 mAh g <sup>-1</sup> (500, 50 mA g <sup>-1</sup> )  | [30] |

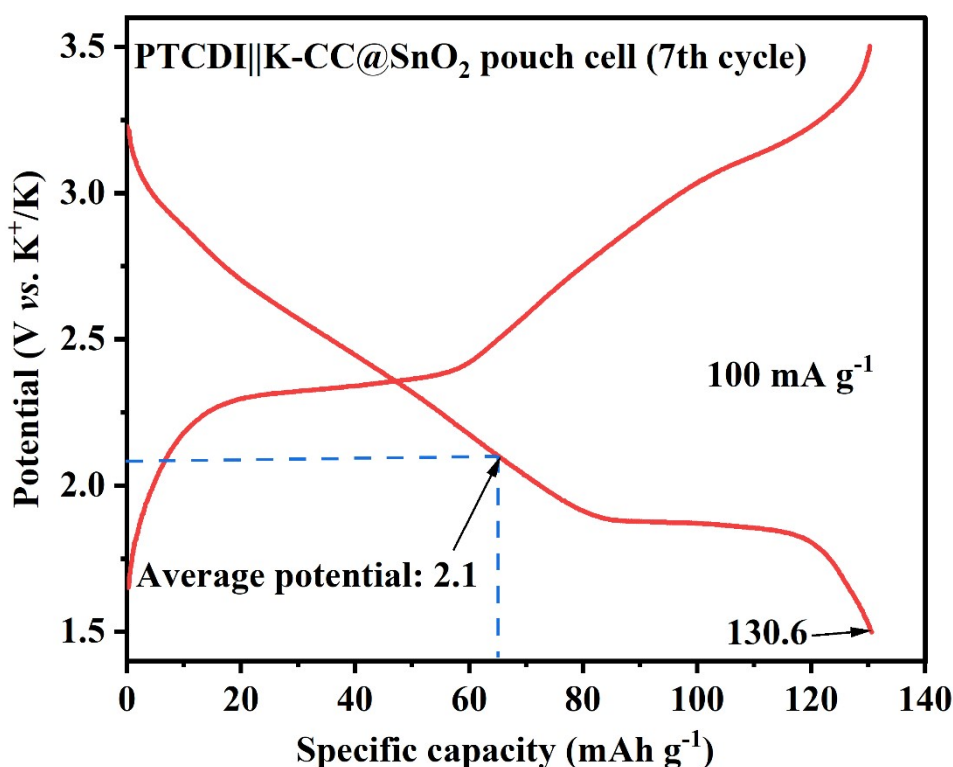

**Figure S18.** The charge/discharge profiles of PTCDI||K-CC@SnO<sub>2</sub> pouch cell.

- [1] M. Xiong, W. Tang, B. Cao, C. Yang and C. Fan, *J. Mater. Chem. A* **2019**, *7*, 20127.
- [2] Y. Hu, W. Tang, Q. Yu, X. Wang, W. Liu, J. Hu and C. Fan, *Adv. Funct. Mater.* **2020**, *30*, 2000675.
- [3] J. Zhao, J. Yang, P. Sun and Y. Xu, *Electrochem. Commun.* **2018**, *86*, 34.
- [4] L. Chen, S. Liu, Y. Wang, W. Liu, Y. Dong, Q. Kuang and Y. Zhao, *Electrochim. Acta* **2019**, *294*, 46.
- [5] L. Chen and Y. Zhao, *Mater. Lett.* **2019**, *243*, 69.
- [6] Q. Xue, D. Li, Y. Huang, X. Zhang, Y. Ye, E. Fan, L. Li, F. Wu and R. Chen, *J. Mater. Chem. A* **2018**, *6*, 12559.
- [7] Y. Chen, W. Luo, M. Carter, L. Zhou, J. Dai, K. Fu, S. Lacey, T. Li, J. Wan, X. Han, Y. Bao and L. Hu, *Nano Energy* **2015**, *18*, 205.
- [8] C. Wang, W. Tang, Z. Yao, B. Cao and C. Fan, *Chem. Commun.* **2019**, *55*, 1801.
- [9] C. Li, Q. Deng, H. Tan, C. Wang, C. Fan, J. Pei, B. Cao, Z. Wang and J. Li, *ACS Appl. Mater. Interfaces* **2017**, *9*, 27414.
- [10] K. Lei, F. Li, C. Mu, J. Wang, Q. Zhao, C. Chen and J. Chen, *Energy Environ. Sci.* **2017**, *10*, 552.
- [11] Q. Deng, J. Pei, C. Fan, J. Ma, B. Cao, C. Li, Y. Jin, L. Wang and J. Li, *Nano Energy* **2017**, *33*, 350.
- [12] Y. Zhu, P. Chen, Y. Zhou, W. Nie and Y. Xu, *Electrochim. Acta* **2019**, *318*, 262.
- [13] Y. Liang, C. Luo, F. Wang, S. Hou, S.-C. Liou, T. Qing, Q. Li, J. Zheng, C. Cui and C. Wang, *Adv. Energy Mater.* **2019**, *9*, 1802986.

- [14] A. Slesarenko, I. K. Yakuschenko, V. Ramezankhani, V. Sivasankaran, O. Romanyuk, A. V. Mumyatov, I. Zhidkov, S. Tsarev, E. Z. Kurmaev, A. F. Shestakov, O. V. Yarmolenko, K. J. Stevenson and P. A. Troshin, *J. Power Sources* **2019**, *435*, 226724.
- [15] M. Zhou, M. Liu, J. Wang, T. Gu, B. Huang, W. Wang, K. Wang, S. Cheng and K. Jiang, *Chem. Commun.* **2019**, *55*, 6054.
- [16] Y. Hu, H. Ding, Y. Bai, Z. Liu, S. Chen, Y. Wu, X. Yu, L. Fan and B. Lu, *ACS Appl. Mater. Interfaces* **2019**, *11*, 42078.
- [17] Z. Jian, Y. Liang, I. A. Rodríguez-Pérez, Y. Yao and X. Ji, *Electrochem. Commun.* **2016**, *71*, 5.
- [18] M. Tang, Y. Wu, Y. Chen, C. Jiang, S. Zhu, S. Zhuo and C. Wang, *J. Mater. Chem. A* **2019**, *7*, 486.
- [19] Z. Tong, S. Tian, H. Wang, D. Shen, R. Yang and C. S. Lee, *Adv. Funct. Mater.* **2020**, *30*, 1907656.
- [20] F. A. Obrezkov, V. Ramezankhani, I. Zhidkov, V. F. Traven, E. Z. Kurmaev, K. J. Stevenson and P. A. Troshin, *J. Phys. Chem. Lett.* **2019**, *10*, 5440.
- [21] F. A. Obrezkov, A. F. Shestakov, V. F. Traven, K. J. Stevenson and P. A. Troshin, *J. Mater. Chem. A* **2019**, *7*, 11430.
- [22] R. R. Kapaev, I. S. Zhidkov, E. Z. Kurmaev, K. J. Stevenson and P. A. Troshin, *J. Mater. Chem. A* **2019**, *7*, 22596.
- [23] Y. An, H. Fei, Z. Zhang, L. Ci, S. Xiong and J. Feng, *Chem. Commun.* **2017**, *53*, 8360.
- [24] X. Xiao, L. Zou, H. Pang and Q. Xu, *Chem. Soc. Rev.* **2020**, *49*, 301.
- [25] C. Li, K. Wang, J. Li and Q. Zhang, *Nanoscale* **2020**, *12*, 7870.
- [26] Q. Deng, S. Feng, P. Hui, H. Chen, C. Tian, R. Yang and Y. Xu, *J. Alloys Compd.* **2020**, *830*, 154714.
- [27] S. Su, Q. Liu, J. Wang, L. Fan, R. Ma, S. Chen, X. Han and B. Lu, *ACS Appl. Mater. Interfaces* **2019**, *11*, 22474.
- [28] S.-Y. Li, W.-H. Li, X.-L. Wu, Y. Tian, J. Yue and G. Zhu, *Chem. Sci.* **2019**, *10*, 7695.
- [29] X. Chen, H. Zhang, C. Ci, W. Sun and Y. Wang, *ACS Nano* **2019**, *13*, 3600.
- [30] C. Zhang, Y. Qiao, P. Xiong, W. Ma, P. Bai, X. Wang, Q. Li, J. Zhao, Y. Xu, Y. Chen, J. H. Zeng, F. Wang, Y. Xu and J.-X. Jiang, *ACS Nano* **2019**, *13*, 745.
